# Supplementary material
Source: publisher figshare collection journal article supplement (https://frontiersin.figshare.com/ndownloader/files/28688868)
Supplement: Supplementary file 1 [file 28688868]

## Appendix C: Regression Tables for Figures 1 through 5

### Regression Tables from Figure 1 (Canada)

#### Impact of Traits on Conservative Party Vote Choice

| VARIABLES                      | 1968      | 1984      | 1988      | 1993      | 1997      |
|--------------------------------|-----------|-----------|-----------|-----------|-----------|
| 1.married                      | -0.209    | 0.319**   | 0.142     | -0.0199   | -0.0678   |
|                                | -0.235    | -0.149    | -0.171    | -0.215    | -0.156    |
| 1.woman                        | 0.0386    | -0.0606   | -0.437*** | 0.198     | 0.175     |
|                                | -0.22     | -0.14     | -0.165    | -0.204    | -0.149    |
| 1.university                   | -0.308    | 0.322**   | 0.278     | -0.437**  | 0.176     |
|                                | -0.277    | -0.152    | -0.17     | -0.213    | -0.151    |
| 1.fulltimework                 | 0.0366    | 0.0677    | -0.0124   | 0.0164    | 0.116     |
|                                | -0.224    | -0.149    | -0.194    | -0.242    | -0.158    |
| 1.over50                       | 0.302     | 0.000882  | 0.222     | -0.420*   | 0.0174    |
|                                | -0.197    | -0.15     | -0.198    | -0.247    | -0.167    |
| 1.consld                       | 2.734***  | 2.717***  | 1.413***  | 1.781***  | 1.850***  |
|                                | -0.211    | -0.223    | -0.202    | -0.236    | -0.179    |
| 1.c_lid                        | -2.804*** | -1.282*** | -0.500**  | -0.592*   | -0.172    |
|                                | -0.286    | -0.187    | -0.213    | -0.343    | -0.196    |
| 1.leftid                       | -1.855*** | -2.365*** | -1.401*** | -0.857    | -2.256*** |
|                                | -0.375    | -0.251    | -0.317    | -0.557    | -0.727    |
| conscompetence                 | 0.806     | 4.307***  | 1.600***  | 3.950***  | 1.279***  |
|                                | -0.501    | -0.461    | -0.563    | -0.621    | -0.335    |
| conscharacter                  | 1.676**   | -3.008*** | 3.259***  | -0.351    | 2.025***  |
|                                | -0.765    | -0.724    | -0.413    | -0.89     | -0.612    |
| c_lcompetence                  | -0.188    | -1.775*** | -2.035*** | -1.797*** | -0.42     |
|                                | -0.443    | -0.318    | -0.466    | -0.544    | -0.301    |
| c_lcharacter                   | -0.511    | 0.887     | -1.136**  | 0.189     | -1.223**  |
|                                | -0.374    | -0.618    | -0.485    | -0.876    | -0.522    |
| leftcompetence                 |           | -0.948**  | -1.089**  | -0.539    |           |
|                                |           | -0.371    | -0.545    | -0.531    |           |
| leftcharacter                  |           | 2.304***  | -0.67     | -0.359    |           |
|                                |           | -0.67     | -0.481    | -0.879    |           |
| Constant                       | -2.626*** | -1.739*** | -0.331    | -3.358*** | -3.169*** |
|                                | -0.863    | -0.49     | -0.501    | -0.721    | -0.4      |
| Observations                   | 1,567     | 2,219     | 1,210     | 1,139     | 1,461     |
| Standard errors in parentheses |           |           |           |           |           |
| *** p<0.01, ** p<0.05, * p<0.1 |           |           |           |           |           |

### Regression Tables from Figure 1 (Canada)

#### Impact of Traits on Liberal Party Vote Choice

| VARIABLES                      | 1968      | 1984      | 1988      | 1993      | 1997      |
|--------------------------------|-----------|-----------|-----------|-----------|-----------|
| 1.married                      | 0.249     | -0.28     | -0.213    | -0.0991   | 0.191     |
|                                | -0.219    | -0.171    | -0.169    | -0.154    | -0.145    |
| 1.woman                        | -0.00457  | 0.0135    | 0.291*    | 0.239     | -0.0522   |
|                                | -0.206    | -0.162    | -0.165    | -0.149    | -0.138    |
| 1.university                   | 0.592**   | -0.107    | 0.124     | -0.114    | 0.178     |
|                                | -0.252    | -0.177    | -0.173    | -0.151    | -0.142    |
| 1.fulltimework                 | -0.0272   | -0.486*** | -0.0506   | 0.0355    | 0.103     |
|                                | -0.21     | -0.171    | -0.192    | -0.17     | -0.147    |
| 1.over50                       | -0.364**  | 0.362**   | -0.186    | -0.0438   | -0.119    |
|                                | -0.185    | -0.173    | -0.195    | -0.17     | -0.157    |
| 1.consld                       | -2.039*** | -2.472*** | -1.291*** | -0.0487   | -0.159    |
|                                | -0.216    | -0.335    | -0.257    | -0.192    | -0.212    |
| 1.c_lid                        | 3.004***  | 2.427***  | 1.182***  | 2.163***  | 2.164***  |
|                                | -0.219    | -0.236    | -0.192    | -0.185    | -0.16     |
| 1.leftid                       | -2.830*** | -2.559*** | -1.314*** | -0.619**  | -0.47     |
|                                | -0.369    | -0.453    | -0.287    | -0.266    | -0.303    |
| conscompetence                 | 0.357     | -3.240*** | -0.133    | -0.897**  | 0.236     |
|                                | -0.386    | -0.509    | -0.462    | -0.378    | -0.297    |
| conscharacter                  | -1.653*** | 1.631*    | -2.323*** | 0.422     | -1.436**  |
|                                | -0.561    | -0.834    | -0.401    | -0.656    | -0.58     |
| c_lcompetence                  | 1.045**   | 3.098***  | 2.007***  | 2.576***  | 1.135***  |
|                                | -0.51     | -0.394    | -0.485    | -0.444    | -0.301    |
| c_lcharacter                   | 1.039**   | -1.536**  | 1.926***  | 1.681**   | 3.626***  |
|                                | -0.429    | -0.756    | -0.501    | -0.658    | -0.518    |
| leftcompetence                 |           | -0.229    | 0.299     | 0.637     |           |
|                                |           | -0.422    | -0.571    | -0.405    |           |
| leftcharacter                  |           | -1.642**  | -0.789    | 0.231     |           |
|                                |           | -0.774    | -0.507    | -0.644    |           |
| Constant                       | -0.877    | 0.245     | -1.598*** | -3.700*** | -3.712*** |
|                                | -0.776    | -0.558    | -0.493    | -0.534    | -0.384    |
| Observations                   | 1,567     | 2,219     | 1,210     | 1,139     | 1,461     |
| Standard errors in parentheses |           |           |           |           |           |
| *** p<0.01, ** p<0.05, * p<0.1 |           |           |           |           |           |

Regression Tables from Figure 1 (Canada)

Impact of Thermometer Ratings on Conservative Party Vote Choice

| VARIABLES | 1968   | 1974    | 1979    | 1980   | 1984   |
|-----------|--------|---------|---------|--------|--------|
| 1.married | -0.122 | 0.496** | -0.0608 | 0.203  | 0.232  |
|           | -0.229 | -0.227  | -0.191  | -0.422 | -0.163 |

|                                |           |           |           |           |           |
|--------------------------------|-----------|-----------|-----------|-----------|-----------|
| 1.woman                        | 0.039     | -0.0371   | 0.0395    | -0.373    | -0.0203   |
|                                | -0.204    | -0.213    | -0.183    | -0.241    | -0.154    |
| 1.university                   | -0.0869   | 0.545***  | 0.537***  | 0.608***  | 0.221     |
|                                | -0.263    | -0.203    | -0.186    | -0.235    | -0.168    |
| 1.fulltimework                 | 0.162     | 0.341     | 0.420**   | 0.217     | 0.101     |
|                                | -0.209    | -0.226    | -0.199    | -0.26     | -0.164    |
| 1.over50                       | 0.417**   | -0.0428   | 0.222     | 0.535**   | -0.133    |
|                                | -0.184    | -0.214    | -0.188    | -0.244    | -0.164    |
| 1.consider                     | 2.436***  | 3.125***  | 2.724***  | 2.857***  | 2.167***  |
|                                | -0.2      | -0.28     | -0.258    | -0.34     | -0.246    |
| 1.c_lid                        | -2.195*** | -1.130*** | -0.997*** | -1.061*** | -1.326*** |
|                                | -0.256    | -0.258    | -0.212    | -0.304    | -0.217    |
| 1.leftid                       | -2.270*** | -1.398*** | -2.689*** | -2.217*** | -2.501*** |
|                                | -0.377    | -0.38     | -0.352    | -0.436    | -0.289    |
| consleadertherm                | 3.728***  | 4.501***  | 3.617***  | 3.602***  | 6.768***  |
|                                | -0.47     | -0.485    | -0.445    | -0.56     | -0.485    |
| c_lleadertherm                 | -2.643*** | -2.621*** | -3.465*** | -3.316*** | -3.804*** |
|                                | -0.367    | -0.413    | -0.333    | -0.462    | -0.414    |
| leftleadertherm                | -0.0701   | -1.478*** | -0.147    | -1.856*** | -0.880**  |
|                                | -0.362    | -0.423    | -0.38     | -0.525    | -0.417    |
| Constant                       | -1.620*** | -1.888*** | -0.994**  | -0.318    | -1.489*** |
|                                | -0.464    | -0.473    | -0.43     | -0.678    | -0.389    |
| Observations                   | 1,943     | 1,673     | 1,885     | 1,284     | 2,112     |
| Standard errors in parentheses |           |           |           |           |           |
| *** p<0.01, ** p<0.05, * p<0.1 |           |           |           |           |           |

#### Regression Tables from Figure 1 (Canada)

##### Impact of Thermometer Ratings on Liberal Party Vote Choice

| VARIABLES      | 1968      | 1974      | 1979      | 1980      | 1984      |
|----------------|-----------|-----------|-----------|-----------|-----------|
| 1.married      | 0.141     | -0.399**  | 0.0899    | 0.659*    | -0.216    |
|                | -0.215    | -0.203    | -0.201    | -0.369    | -0.184    |
| 1.woman        | 0.195     | 0.24      | -0.106    | 0.0639    | -0.0805   |
|                | -0.194    | -0.192    | -0.195    | -0.24     | -0.174    |
| 1.university   | 0.212     | -0.543*** | -0.742*** | -0.688*** | 0.0893    |
|                | -0.244    | -0.189    | -0.197    | -0.242    | -0.19     |
| 1.fulltimework | 0.214     | -0.0598   | -0.206    | -0.216    | -0.497*** |
|                | -0.198    | -0.201    | -0.206    | -0.254    | -0.185    |
| 1.over50       | -0.0941   | 0.233     | 0.197     | -0.0826   | 0.528***  |
|                | -0.176    | -0.199    | -0.201    | -0.245    | -0.185    |
| 1.consider     | -1.596*** | -1.175*** | -1.930*** | -2.230*** | -2.043*** |
|                | -0.214    | -0.3      | -0.348    | -0.472    | -0.346    |

|                                |           |           |           |           |           |
|--------------------------------|-----------|-----------|-----------|-----------|-----------|
| 1.c_lid                        | 2.674***  | 2.711***  | 2.290***  | 2.286***  | 2.267***  |
|                                | -0.205    | -0.229    | -0.217    | -0.283    | -0.255    |
| 1.leftid                       | -2.306*** | -1.400*** | -2.326*** | -2.225*** | -2.592*** |
|                                | -0.325    | -0.389    | -0.435    | -0.419    | -0.471    |
| consleadertherm                | -1.426*** | -1.617*** | -2.016*** | -3.022*** | -4.665*** |
|                                | -0.42     | -0.398    | -0.443    | -0.568    | -0.482    |
| c_lleadertherm                 | 4.871***  | 4.025***  | 5.672***  | 5.027***  | 5.243***  |
|                                | -0.411    | -0.439    | -0.451    | -0.549    | -0.502    |
| leftleadertherm                | -0.861**  | -0.257    | -1.262*** | -0.589    | -1.188*** |
|                                | -0.349    | -0.388    | -0.42     | -0.551    | -0.459    |
| Constant                       | -2.523*** | -2.388*** | -2.611*** | -2.273*** | -0.821*   |
|                                | -0.461    | -0.45     | -0.494    | -0.682    | -0.424    |
| Observations                   | 1,943     | 1,673     | 1,885     | 1,284     | 2,112     |
| Standard errors in parentheses |           |           |           |           |           |
| *** p<0.01, ** p<0.05, * p<0.1 |           |           |           |           |           |

#### Regression Tables from Figure 2 (UK)

##### Impact of Traits on Conservative Party Vote Choice

| VARIABLES      | 1983      | 1987      | 1992      | 1997      | 2001      |
|----------------|-----------|-----------|-----------|-----------|-----------|
| 1.married      | -0.113    | -0.0652   | 0.201     | 0.25      | 0.0494    |
|                | -0.157    | -0.144    | -0.194    | -0.218    | -0.209    |
| 1.woman        | -0.623*** | -0.135    | 0.105     | -0.416**  | 0.184     |
|                | -0.148    | -0.136    | -0.178    | -0.209    | -0.202    |
| 1.university   | -0.291*   | 0.174     | 0.214     | -0.54     | -0.152    |
|                | -0.167    | -0.152    | -0.196    | -0.345    | -0.228    |
| 1.fulltimework | -0.108    | 0.388**   | 0.0483    | -0.0972   | 0.28      |
|                | -0.16     | -0.154    | -0.206    | -0.233    | -0.23     |
| 1.over50       | 0.333**   | 0.156     | 0.202     | -0.159    | 0.656***  |
|                | -0.158    | -0.147    | -0.2      | -0.235    | -0.231    |
| 1.consld       | 3.286***  | 2.322***  | 3.773***  | 2.095***  | -2.092*** |
|                | -0.182    | -0.156    | -0.244    | -0.305    | -0.359    |
| 1.c_lid        | -1.984*** | -1.841*** | -1.747*** | -1.249*** | 2.445***  |
|                | -0.212    | -0.208    | -0.358    | -0.386    | -0.231    |
| 1.leftid       | -0.741*** | -1.195*** | -0.480*   | -1.055*** | -1.316*** |
|                | -0.199    | -0.212    | -0.29     | -0.402    | -0.413    |
| conscompetence | 3.519***  | 0.754     | 0.913***  | 1.086***  | 0.00105   |
|                | -0.348    | -0.562    | -0.261    | -0.258    | -0.288    |
| conscharacter  | 3.567***  | 2.568***  | 3.003***  | 2.279***  | 2.926***  |
|                | -0.377    | -0.179    | -0.418    | -0.412    | -0.406    |
| c_lcompetence  | -0.781*   | -0.773*** | -0.662*** | -0.929*** | -0.327    |

|                                |           |           |           |           |           |
|--------------------------------|-----------|-----------|-----------|-----------|-----------|
|                                | -0.437    | -0.182    | -0.184    | -0.276    | -0.286    |
| c_lcharacter                   | -1.911*** | -0.514**  | -0.808*** | -0.837*** | -1.644*** |
|                                | -0.263    | -0.217    | -0.238    | -0.288    | -0.359    |
| leftcompetence                 | -0.872*** | -1.179*** | -0.27     |           | -0.122    |
|                                | -0.311    | -0.191    | -0.215    |           | -0.322    |
| leftcharacter                  | -1.973*** | -0.628**  | -0.104    |           | -1.280*** |
|                                | -0.263    | -0.287    | -0.401    |           | -0.477    |
| Constant                       | -1.765*** | -1.059*   | -4.271*** | -2.282*** | -1.808*** |
|                                | -0.329    | -0.605    | -0.592    | -0.53     | -0.501    |
| Observations                   | 3,102     | 3,107     | 2,323     | 1,249     | 1,595     |
| Standard errors in parentheses |           |           |           |           |           |
| *** p<0.01, ** p<0.05, * p<0.1 |           |           |           |           |           |

#### Regression Tables from Figure 2 (UK)

##### Impact of Traits on Labour Party Vote Choice

| VARIABLES      | 1983      | 1987      | 1992      | 1997      | 2001      |
|----------------|-----------|-----------|-----------|-----------|-----------|
| 1.married      | 0.145     | -0.292*   | 0.0435    | -0.252    | 0.244     |
|                | -0.167    | -0.156    | -0.182    | -0.18     | -0.168    |
| 1.woman        | 0.0306    | 0.299**   | 0.134     | 0.465***  | -0.129    |
|                | -0.151    | -0.149    | -0.168    | -0.176    | -0.163    |
| 1.university   | -0.621*** | -0.503*** | -0.620*** | -0.516**  | -0.386**  |
|                | -0.194    | -0.181    | -0.199    | -0.253    | -0.188    |
| 1.fulltimework | -0.111    | -0.238    | -0.449**  | 0.0782    | -0.215    |
|                | -0.162    | -0.164    | -0.191    | -0.198    | -0.189    |
| 1.over50       | -0.218    | -0.314*   | -0.0078   | -0.276    | -0.102    |
|                | -0.164    | -0.161    | -0.191    | -0.198    | -0.186    |
| 1.consld       | -2.257*** | -1.059*** | -1.803*** | -0.774**  | 2.446***  |
|                | -0.393    | -0.252    | -0.291    | -0.313    | -0.209    |
| 1.c_lid        | 3.135***  | 3.163***  | 3.191***  | 2.286***  | -0.656**  |
|                | -0.174    | -0.176    | -0.225    | -0.264    | -0.265    |
| 1.leftid       | -1.281*** | -1.330*** | -0.837*** | -0.826**  | -0.551*   |
|                | -0.327    | -0.286    | -0.295    | -0.327    | -0.315    |
| conscompetence | -1.816*** | -0.929**  | -0.593*** | -0.645*** | -0.712*** |
|                | -0.317    | -0.409    | -0.19     | -0.244    | -0.241    |
| conscharacter  | -1.767*** | -1.445*** | -0.648*** | -0.740*** | -0.862*** |
|                | -0.463    | -0.207    | -0.205    | -0.246    | -0.292    |
| c_lcompetence  | 1.471***  | 1.838***  | 0.964***  | 1.260***  | 1.034***  |
|                | -0.394    | -0.22     | -0.175    | -0.296    | -0.276    |
| c_lcharacter   | 2.394***  | 1.585***  | 1.773***  | 1.171***  | 3.295***  |
|                | -0.259    | -0.318    | -0.308    | -0.298    | -0.339    |

|                                |           |           |           |           |           |
|--------------------------------|-----------|-----------|-----------|-----------|-----------|
| leftcompetence                 | -0.687**  | 0.0973    | -0.0879   |           | -0.733*** |
|                                | -0.315    | -0.214    | -0.205    |           | -0.282    |
| leftcharacter                  | -0.699*** | -1.262*** | -1.145*** |           | -2.017*** |
|                                | -0.268    | -0.329    | -0.369    |           | -0.418    |
| Constant                       | -0.877*** | -1.450*** | -1.233*** | -2.249*** | -0.927**  |
|                                | -0.318    | -0.528    | -0.421    | -0.428    | -0.432    |
| Observations                   | 3,102     | 3,107     | 2,323     | 1,249     | 1,595     |
| Standard errors in parentheses |           |           |           |           |           |
| *** p<0.01, ** p<0.05, * p<0.1 |           |           |           |           |           |

#### Regression Tables from Figure 2 (UK)

##### Impact of Thermometer Ratings on Conservative Party Vote Choice

| VARIABLES                      | 1973      | 1974      | 1979      | 2001      | 2005      |
|--------------------------------|-----------|-----------|-----------|-----------|-----------|
| 1.married                      | -0.0668   | -0.0605   | 0.0877    | 0.0587    | 0.524**   |
|                                | -0.205    | -0.203    | -0.225    | -0.205    | -0.232    |
| 1.woman                        | 0.0125    | -0.208    | 0.1       | 0.208     | -0.0353   |
|                                | -0.192    | -0.192    | -0.232    | -0.196    | -0.223    |
| 1.university                   | -0.00773  | -0.185    | -0.122    | -0.0284   | 0.00759   |
|                                | -0.185    | -0.181    | -0.211    | -0.223    | -0.222    |
| 1.fulltimework                 | 0.206     | 0.0596    | -0.106    | 0.246     | 0.415*    |
|                                | -0.205    | -0.209    | -0.237    | -0.226    | -0.252    |
| 1.over50                       | 0.12      | 0.356*    | 0.166     | 0.686***  | 0.24      |
|                                | -0.189    | -0.192    | -0.21     | -0.223    | -0.251    |
| 1.consld                       | 3.020***  | 2.915***  | 2.923***  | -2.191*** | 2.733***  |
|                                | -0.309    | -0.284    | -0.303    | -0.369    | -0.267    |
| 1.c_lid                        | -0.963**  | -1.734*** | -1.625*** | 2.380***  | -0.875**  |
|                                | -0.378    | -0.393    | -0.329    | -0.229    | -0.354    |
| 1.leftid                       | 0.105     | -0.104    | -0.46     | -0.982**  | -0.203    |
|                                | -0.356    | -0.329    | -0.338    | -0.404    | -0.371    |
| consleadertherm                | 4.359***  | 3.205***  | 3.939***  | 2.502***  | 3.552***  |
|                                | -0.388    | -0.396    | -0.48     | -0.473    | -0.553    |
| c_lleadertherm                 | -1.975*** | -2.062*** | -2.359*** | -1.557*** | -1.981*** |
|                                | -0.387    | -0.394    | -0.543    | -0.396    | -0.421    |
| leftleadertherm                | -2.148*** | -0.919**  | -2.414*** | -1.788*** | -1.896*** |
|                                | -0.436    | -0.434    | -0.547    | -0.588    | -0.555    |
| Constant                       | -2.131*** | -1.703*** | -0.331    | -1.660*** | -2.309*** |
|                                | -0.486    | -0.477    | -0.546    | -0.466    | -0.518    |
| Observations                   | 2,056     | 1,969     | 1,539     | 1,564     | 1,023     |
| Standard errors in parentheses |           |           |           |           |           |

\*\*\* p<0.01, \*\* p<0.05, \* p<0.1

#### Regression Tables from Figure 2 (UK)

##### Impact of Thermometer Ratings on Labour Party Vote Choice

| VARIABLES       | 1973      | 1974      | 1979      | 2001      | 2005      |
|-----------------|-----------|-----------|-----------|-----------|-----------|
| 1.married       | 0.305     | -0.0973   | -0.173    | 0.132     | -0.108    |
|                 | -0.193    | -0.228    | -0.225    | -0.162    | -0.201    |
| 1.woman         | 0.227     | 0.184     | 0.078     | 0.0414    | 0.408**   |
|                 | -0.183    | -0.208    | -0.236    | -0.157    | -0.199    |
| 1.university    | -0.0568   | 0.142     | -0.510**  | -0.510*** | -0.0775   |
|                 | -0.19     | -0.211    | -0.218    | -0.183    | -0.199    |
| 1.fulltimework  | 0.360*    | 0.0654    | 0.0593    | -0.193    | -0.287    |
|                 | -0.196    | -0.234    | -0.241    | -0.184    | -0.225    |
| 1.over50        | -0.164    | -0.350*   | 0.0342    | -0.394**  | -0.789*** |
|                 | -0.179    | -0.211    | -0.215    | -0.182    | -0.215    |
| 1.consider      | -1.195*** | -1.465*** | -2.380*** | 2.057***  | -1.056*** |
|                 | -0.397    | -0.357    | -0.429    | -0.193    | -0.329    |
| 1.c_lid         | 3.083***  | 2.993***  | 2.663***  | -1.113*** | 2.063***  |
|                 | -0.319    | -0.287    | -0.308    | -0.26     | -0.24     |
| 1.leftid        | -0.0666   | -0.564    | -0.506    | -0.866*** | -0.0481   |
|                 | -0.391    | -0.356    | -0.398    | -0.309    | -0.317    |
| consleadertherm | -0.994*** | -1.639*** | -2.134*** | -0.679*   | -1.669*** |
|                 | -0.315    | -0.381    | -0.381    | -0.362    | -0.457    |
| c_lleadertherm  | 3.249***  | 5.660***  | 4.556***  | 3.771***  | 4.262***  |
|                 | -0.428    | -0.546    | -0.633    | -0.369    | -0.434    |
| leftleadertherm | -1.962*** | -2.384*** | -2.871*** | -2.076*** | -1.902*** |
|                 | -0.393    | -0.477    | -0.562    | -0.484    | -0.504    |
| Constant        | -2.829*** | -2.989*** | -1.242**  | -1.285*** | -1.266*** |
|                 | -0.499    | -0.534    | -0.576    | -0.389    | -0.467    |
| Observations    | 2,056     | 1,969     | 1,539     | 1,564     | 1,023     |

Standard errors in parentheses

\*\*\* p<0.01, \*\* p<0.05, \* p<0.1

#### Regression Tables from Figure 3 (US)

##### Impact of Traits on Republican Party Vote Choice

| VARIABLES | 1972    | 1976   | 1980   | 1984  | 1988   |
|-----------|---------|--------|--------|-------|--------|
| 1.married | 0.380** | 0.258  | 0.0927 | 0.285 | 0.328  |
|           | -0.182  | -0.195 | -0.205 | -0.21 | -0.216 |

|                |           |           |           |           |           |
|----------------|-----------|-----------|-----------|-----------|-----------|
| 1.woman        | -0.345**  | 0.148     | -0.17     | -0.0358   | -0.0922   |
|                | -0.176    | -0.186    | -0.201    | -0.211    | -0.218    |
| 1.university   | -0.274    | 0.577***  | -0.256    | -0.227    | 0.272     |
|                | -0.218    | -0.22     | -0.238    | -0.263    | -0.242    |
| 1.fulltimework | -0.187    | -0.474**  | -0.169    | 0.27      | 0.199     |
|                | -0.183    | -0.197    | -0.226    | -0.251    | -0.255    |
| 1.over50       | 0.430**   | -0.417**  | -0.0798   | 0.0857    | -0.0585   |
|                | -0.184    | -0.19     | -0.211    | -0.243    | -0.245    |
| 1.consider     | 1.264***  | 1.254***  | 1.215***  | 0.982***  | 1.391***  |
|                | -0.274    | -0.227    | -0.267    | -0.312    | -0.28     |
| 1.c_lid        | -0.714*** | -1.311*** | -0.553**  | -1.209*** | -1.028*** |
|                | -0.177    | -0.203    | -0.22     | -0.226    | -0.236    |
| conscompetence | 0.911***  | 1.708***  | 5.085***  | 3.187***  | 5.758***  |
|                | -0.31     | -0.36     | -0.604    | -0.817    | -0.798    |
| conscharacter  | 3.331***  | 4.683***  | 2.614***  | 8.940***  | 7.167***  |
|                | -0.327    | -0.46     | -0.564    | -0.937    | -0.81     |
| c_lcompetence  | -1.445*** | -2.293*** | -3.116*** | -4.965*** | -4.619*** |
|                | -0.352    | -0.39     | -0.559    | -0.939    | -0.836    |
| c_lcharacter   | -1.992*** | -2.579*** | -1.092**  | -5.056*** | -5.532*** |
|                | -0.34     | -0.41     | -0.523    | -0.999    | -0.863    |
| Constant       | -0.26     | -1.253*** | -2.231*** | -0.686    | -1.647**  |
|                | -0.34     | -0.434    | -0.567    | -0.587    | -0.647    |

Observations 1,433 1,230 914 1,312 1,151

Standard errors in parentheses

\*\*\* p<0.01, \*\* p<0.05, \* p<0.1

#### Regression Tables from Figure 3 (US)

##### Impact of Traits on Democratic Party Vote Choice

| VARIABLES      | 1972      | 1976      | 1980      | 1984      | 1988      |
|----------------|-----------|-----------|-----------|-----------|-----------|
| 1.married      | -0.364**  | -0.231    | 0.0448    | -0.123    | -0.323    |
|                | -0.184    | -0.195    | -0.222    | -0.208    | -0.205    |
| 1.woman        | 0.412**   | -0.0577   | -0.139    | 0.0636    | 0.179     |
|                | -0.179    | -0.186    | -0.22     | -0.209    | -0.208    |
| 1.university   | 0.326     | -0.602*** | -0.166    | 0.165     | -0.512**  |
|                | -0.221    | -0.222    | -0.267    | -0.261    | -0.233    |
| 1.fulltimework | 0.246     | 0.458**   | 0.161     | -0.07     | -0.0311   |
|                | -0.186    | -0.198    | -0.249    | -0.248    | -0.244    |
| 1.over50       | -0.390**  | 0.480**   | 0.443*    | -0.138    | 0.084     |
|                | -0.187    | -0.191    | -0.237    | -0.241    | -0.233    |
| 1.consider     | -1.160*** | -1.274*** | -1.427*** | -1.066*** | -1.349*** |
|                | -0.282    | -0.233    | -0.377    | -0.32     | -0.274    |



|                                |           |           |           |           |           |
|--------------------------------|-----------|-----------|-----------|-----------|-----------|
| 1.c_lid                        | 0.855***  | 1.387***  | 1.205***  | 1.165***  | 0.907***  |
|                                | -0.18     | -0.201    | -0.227    | -0.222    | -0.223    |
| conscompetence                 | -0.883*** | -1.578*** | -3.812*** | -4.079*** | -5.537*** |
|                                | -0.315    | -0.359    | -0.618    | -0.821    | -0.754    |
| conscharacter                  | -3.235*** | -4.272*** | -2.230*** | -7.806*** | -6.064*** |
|                                | -0.332    | -0.448    | -0.607    | -0.892    | -0.736    |
| c_lcompetence                  | 1.706***  | 2.494***  | 5.597***  | 5.362***  | 4.123***  |
|                                | -0.359    | -0.395    | -0.655    | -0.946    | -0.791    |
| c_lcharacter                   | 2.162***  | 2.921***  | 2.617***  | 4.664***  | 5.203***  |
|                                | -0.348    | -0.421    | -0.605    | -0.98     | -0.822    |
| Constant                       | -0.336    | 0.236     | -2.183*** | 0.334     | 1.156*    |
|                                | -0.343    | -0.426    | -0.606    | -0.581    | -0.613    |
| Observations                   | 1,433     | 1,230     | 914       | 1,312     | 1,151     |
| Standard errors in parentheses |           |           |           |           |           |
| *** p<0.01, ** p<0.05, * p<0.1 |           |           |           |           |           |

#### Regression Tables from Figure 3 (US)

##### Impact of Thermometer Ratings on Republican Party Vote Choice

| VARIABLES       | 1972      | 1976      | 1980      | 1984      | 1988      |
|-----------------|-----------|-----------|-----------|-----------|-----------|
| 1.married       | 0.352*    | 0.311     | 0.0429    | 0.149     | 0.383*    |
|                 | -0.188    | -0.206    | -0.221    | -0.223    | -0.229    |
| 1.woman         | -0.257    | 0.0957    | -0.360*   | 0.024     | 0.252     |
|                 | -0.183    | -0.194    | -0.216    | -0.222    | -0.23     |
| 1.university    | -0.098    | 0.351     | -0.214    | -0.512*   | 0.00852   |
|                 | -0.234    | -0.235    | -0.257    | -0.28     | -0.252    |
| 1.fulltimework  | -0.167    | -0.546*** | -0.266    | 0.33      | -0.00492  |
|                 | -0.189    | -0.207    | -0.244    | -0.266    | -0.27     |
| 1.over50        | 0.415**   | -0.391**  | -0.0935   | 0.0396    | 0.34      |
|                 | -0.189    | -0.198    | -0.228    | -0.259    | -0.254    |
| 1.consider      | 0.931***  | 1.001***  | 1.130***  | 0.635*    | 0.898***  |
|                 | -0.282    | -0.244    | -0.292    | -0.33     | -0.292    |
| 1.c_lid         | -0.458**  | -0.932*** | -0.352    | -1.150*** | -0.631**  |
|                 | -0.186    | -0.213    | -0.238    | -0.242    | -0.251    |
| consleadertherm | 6.252***  | 7.742***  | 7.707***  | 9.635***  | 8.643***  |
|                 | -0.461    | -0.618    | -0.647    | -0.756    | -0.675    |
| c_lleadertherm  | -5.716*** | -7.879*** | -4.820*** | -6.532*** | -7.422*** |
|                 | -0.428    | -0.566    | -0.536    | -0.694    | -0.682    |
| Constant        | -0.456    | 0.0967    | -1.313**  | -1.723*** | -1.493*** |
|                 | -0.431    | -0.505    | -0.539    | -0.662    | -0.556    |
| Observations    | 1,556     | 1,310     | 920       | 1,341     | 1,164     |

Standard errors in parentheses

\*\*\* p<0.01, \*\* p<0.05, \* p<0.1

#### Regression Tables from Figure 3 (US)

##### Impact of Thermometer Ratings on Democratic Party Vote Choice

| VARIABLES       | 1972      | 1976      | 1980      | 1984      | 1988      |
|-----------------|-----------|-----------|-----------|-----------|-----------|
| 1.married       | -0.342*   | -0.272    | 0.122     | -0.0159   | -0.354    |
|                 | -0.191    | -0.206    | -0.233    | -0.224    | -0.219    |
| 1.woman         | 0.298     | 0.00838   | 0.0944    | -0.00892  | -0.123    |
|                 | -0.186    | -0.196    | -0.227    | -0.223    | -0.22     |
| 1.university    | 0.104     | -0.316    | -0.39     | 0.344     | -0.292    |
|                 | -0.238    | -0.239    | -0.273    | -0.281    | -0.243    |
| 1.fulltimework  | 0.215     | 0.516**   | 0.229     | -0.121    | 0.195     |
|                 | -0.192    | -0.209    | -0.255    | -0.266    | -0.26     |
| 1.over50        | -0.390**  | 0.417**   | 0.436*    | -0.0914   | -0.225    |
|                 | -0.192    | -0.201    | -0.242    | -0.26     | -0.245    |
| 1.consld        | -0.863*** | -1.052*** | -1.461*** | -0.877**  | -0.827*** |
|                 | -0.293    | -0.256    | -0.399    | -0.349    | -0.288    |
| 1.c_lid         | 0.603***  | 0.976***  | 0.960***  | 1.044***  | 0.502**   |
|                 | -0.188    | -0.211    | -0.235    | -0.239    | -0.239    |
| consleadertherm | -5.809*** | -6.644*** | -5.092*** | -9.022*** | -7.874*** |
|                 | -0.456    | -0.599    | -0.565    | -0.723    | -0.621    |
| c_lleadertherm  | 6.347***  | 8.886***  | 8.203***  | 7.112***  | 7.180***  |
|                 | -0.454    | -0.613    | -0.744    | -0.713    | -0.639    |
| Constant        | -0.472    | -1.770*** | -3.482*** | 0.736     | 0.853     |
|                 | -0.437    | -0.529    | -0.573    | -0.65     | -0.523    |
| Observations    | 1,556     | 1,310     | 920       | 1,341     | 1,164     |

Standard errors in parentheses

\*\*\* p<0.01, \*\* p<0.05, \* p<0.1

#### Regression Tables from Figure 4 (AUS)

##### Impact of Traits on Liberal Party Vote Choice

| VARIABLES      | 1987    | 1993   | 1996   | 1998     | 2001    |
|----------------|---------|--------|--------|----------|---------|
| 1.married      | -0.0149 | 0.0849 | 0.0928 | 0.0535   | 0.303   |
|                | -0.194  | -0.168 | -0.178 | -0.183   | -0.191  |
| 1.woman        | -0.0608 | -0.147 | 0.0358 | -0.0484  | -0.0718 |
|                | -0.194  | -0.159 | -0.171 | -0.175   | -0.183  |
| 1.university   | 0.359*  | 0.248  | -0.105 | 0.600*** | -0.0758 |
|                | -0.197  | -0.204 | -0.195 | -0.193   | -0.179  |
| 1.fulltimework | 0.149   | -0.184 | -0.282 | 0.151    | 0.423** |

|                                |           |           |           |           |           |
|--------------------------------|-----------|-----------|-----------|-----------|-----------|
|                                | -0.203    | -0.17     | -0.182    | -0.185    | -0.187    |
| 1.over50                       | 0.146     | 0.387**   | 0.0853    | -0.141    | 0.2       |
|                                | -0.197    | -0.158    | -0.185    | -0.18     | -0.184    |
| 1.consider                     | 2.945***  | 2.790***  | 2.505***  | 2.329***  | 2.833***  |
|                                | -0.216    | -0.166    | -0.199    | -0.186    | -0.2      |
| 1.c_lid                        | -0.409    | -1.450*** | -1.200*** | -1.047*** | -0.850*** |
|                                | -0.277    | -0.21     | -0.212    | -0.226    | -0.24     |
| conscompetence                 | 1.151***  | -0.0931   | 2.124***  | 1.517**   | 1.692***  |
|                                | -0.366    | -0.491    | -0.578    | -0.602    | -0.6      |
| conscharacter                  | 1.421***  | 4.217***  | 2.636***  | 3.103***  | 2.511***  |
|                                | -0.294    | -0.557    | -0.655    | -0.528    | -0.472    |
| c_lcompetence                  | -1.225*** | 0.371     | -1.243*** | -0.813    | -1.703*** |
|                                | -0.325    | -0.39     | -0.455    | -0.612    | -0.634    |
| c_lcharacter                   | -1.932*** | -3.660*** | -1.395*** | -1.001*   | -1.658*** |
|                                | -0.351    | -0.396    | -0.479    | -0.592    | -0.531    |
| Constant                       | -1.644*** | -1.848*** | -2.040*** | -2.933*** | -2.137*** |
|                                | -0.383    | -0.354    | -0.431    | -0.403    | -0.414    |
| Observations                   | 1,567     | 2,527     | 1,441     | 1,463     | 1,538     |
| Standard errors in parentheses |           |           |           |           |           |
| *** p<0.01, ** p<0.05, * p<0.1 |           |           |           |           |           |

#### Regression Tables from Figure 4 (AUS)

##### Impact of Traits on Labor Party Vote Choice

| VARIABLES      | 1987      | 1993      | 1996      | 1998      | 2001      |
|----------------|-----------|-----------|-----------|-----------|-----------|
| 1.married      | 0.293     | -0.243    | -0.0661   | -0.102    | -0.133    |
|                | -0.202    | -0.169    | -0.226    | -0.196    | -0.183    |
| 1.woman        | -0.355*   | -0.135    | -0.465**  | -0.0923   | -0.305*   |
|                | -0.202    | -0.164    | -0.221    | -0.191    | -0.181    |
| 1.university   | -0.152    | -0.405*   | 0.354     | -0.553*** | -0.129    |
|                | -0.215    | -0.208    | -0.256    | -0.208    | -0.177    |
| 1.fulltimework | -0.085    | 0.161     | 0.574**   | -0.00646  | -0.226    |
|                | -0.213    | -0.174    | -0.237    | -0.199    | -0.185    |
| 1.over50       | -0.114    | -0.300*   | 0.444*    | 0.146     | -0.456**  |
|                | -0.212    | -0.169    | -0.248    | -0.199    | -0.187    |
| 1.consider     | -1.024*** | -1.313*** | -1.905*** | -1.139*** | -1.199*** |
|                | -0.252    | -0.209    | -0.46     | -0.299    | -0.279    |
| 1.c_lid        | 2.652***  | 2.474***  | 3.070***  | 2.955***  | 2.907***  |
|                | -0.224    | -0.173    | -0.228    | -0.198    | -0.19     |
| conscompetence | -1.745*** | -1.486*** | -2.566*** | -0.0392   | -2.245*** |
|                | -0.432    | -0.493    | -0.683    | -0.607    | -0.526    |
| conscharacter  | -1.252*** | -3.488*** | -3.286*** | -3.248*** | -0.729*   |

|                                |           |           |           |           |           |
|--------------------------------|-----------|-----------|-----------|-----------|-----------|
|                                | -0.334    | -0.566    | -0.797    | -0.562    | -0.42     |
| c_lcompetence                  | 1.053***  | 1.195***  | 2.054***  | 0.381     | 2.034***  |
|                                | -0.337    | -0.462    | -0.646    | -0.716    | -0.639    |
| c_lcharacter                   | 2.812***  | 5.141***  | 4.299***  | 2.588***  | 1.001*    |
|                                | -0.325    | -0.451    | -0.649    | -0.709    | -0.514    |
| Constant                       | -1.626*** | -1.118*** | -2.029*** | -1.501*** | -0.999*** |
|                                | -0.382    | -0.343    | -0.525    | -0.415    | -0.388    |
| Observations                   | 1,567     | 2,527     | 1,441     | 1,463     | 1,538     |
| Standard errors in parentheses |           |           |           |           |           |
| *** p<0.01, ** p<0.05, * p<0.1 |           |           |           |           |           |

#### Regression Tables from Figure 4 (AUS)

##### Impact of Thermometer Ratings on Liberal Party Vote Choice

| VARIABLES                      | 1987      | 1990      | 1993      | 1996      | 1998      |
|--------------------------------|-----------|-----------|-----------|-----------|-----------|
| 1.married                      | -0.0204   | 0.377*    | 0.0777    | 0.0791    | 0.0744    |
|                                | -0.194    | -0.195    | -0.17     | -0.178    | -0.179    |
| 1.woman                        | -0.143    | -0.406**  | -0.251    | -0.00824  | -0.0763   |
|                                | -0.193    | -0.17     | -0.162    | -0.171    | -0.171    |
| 1.university                   | 0.186     | 0.172     | 0.273     | -0.00534  | 0.648***  |
|                                | -0.196    | -0.189    | -0.204    | -0.195    | -0.191    |
| 1.fulltimework                 | 0.246     | 0.352     | -0.0908   | -0.277    | 0.154     |
|                                | -0.202    | -0.576    | -0.173    | -0.181    | -0.182    |
| 1.over50                       | 0.126     | 0.0537    | 0.280*    | 0.0876    | -0.113    |
|                                | -0.196    | -0.177    | -0.161    | -0.185    | -0.177    |
| 1.consld                       | 2.844***  | 3.355***  | 2.618***  | 2.313***  | 2.213***  |
|                                | -0.215    | -0.213    | -0.169    | -0.2      | -0.183    |
| 1.c_lid                        | -0.518*   | 0.028     | -1.048*** | -1.039*** | -0.920*** |
|                                | -0.279    | -0.253    | -0.217    | -0.216    | -0.23     |
| consleadertherm                | 2.815***  | 2.278***  | 3.362***  | 3.063***  | 3.423***  |
|                                | -0.36     | -0.328    | -0.3      | -0.376    | -0.356    |
| c_lleadertherm                 | -1.672*** | -2.298*** | -2.405*** | -1.229*** | -1.178*** |
|                                | -0.315    | -0.301    | -0.27     | -0.291    | -0.338    |
| Constant                       | -2.507*** | -1.890*** | -1.980*** | -1.899*** | -2.597*** |
|                                | -0.411    | -0.321    | -0.307    | -0.346    | -0.347    |
| Observations                   | 1,525     | 1,735     | 2,450     | 1,450     | 1,484     |
| Standard errors in parentheses |           |           |           |           |           |
| *** p<0.01, ** p<0.05, * p<0.1 |           |           |           |           |           |

#### Regression Tables from Figure 4 (AUS)

##### Impact of Thermometer Ratings on Labour Party Vote Choice

| VARIABLES                      | 1987                | 1990                | 1993                | 1996                | 1998                |
|--------------------------------|---------------------|---------------------|---------------------|---------------------|---------------------|
| 1.married                      | 0.203<br>-0.206     | -0.0713<br>-0.189   | -0.263<br>-0.174    | -0.159<br>-0.223    | -0.301<br>-0.193    |
| 1.woman                        | -0.0837<br>-0.204   | 0.0974<br>-0.172    | 0.0507<br>-0.168    | -0.415*<br>-0.22    | -0.182<br>-0.189    |
| 1.university                   | 0.0488<br>-0.215    | -0.411**<br>-0.193  | -0.407**<br>-0.206  | 0.144<br>-0.251     | -0.652***<br>-0.207 |
| 1.fulltimework                 | 0.00958<br>-0.215   | 0.603<br>-0.604     | 0.128<br>-0.178     | 0.629***<br>-0.234  | 0.0282<br>-0.197    |
| 1.over50                       | -0.106<br>-0.218    | 0.129<br>-0.186     | -0.124<br>-0.172    | 0.411*<br>-0.244    | 0.085<br>-0.198     |
| 1.consld                       | -0.981***<br>-0.255 | -0.567*<br>-0.316   | -0.963***<br>-0.213 | -1.568***<br>-0.433 | -1.209***<br>-0.299 |
| 1.c_lid                        | 2.409***<br>-0.229  | 2.592***<br>-0.223  | 2.123***<br>-0.178  | 2.851***<br>-0.224  | 2.642***<br>-0.196  |
| consleadertherm                | -2.150***<br>-0.362 | -2.010***<br>-0.369 | -3.273***<br>-0.318 | -3.054***<br>-0.445 | -1.902***<br>-0.339 |
| c_lleadertherm                 | 4.019***<br>-0.384  | 5.090***<br>-0.404  | 4.436***<br>-0.304  | 3.320***<br>-0.362  | 3.243***<br>-0.414  |
| Constant                       | -2.505***<br>-0.423 | -4.196***<br>-0.402 | -1.142***<br>-0.297 | -1.894***<br>-0.405 | -2.130***<br>-0.372 |
| Observations                   | 1,525               | 1,735               | 2,450               | 1,450               | 1,484               |
| Standard errors in parentheses |                     |                     |                     |                     |                     |
| *** p<0.01, ** p<0.05, * p<0.1 |                     |                     |                     |                     |                     |

#### Regression Tables from Figure 5 (NZ)

##### Impact of Traits on Labor Party Vote Choice

| VARIABLES      | 1990                | 1999                | 2002              | 2005                | 2014               |
|----------------|---------------------|---------------------|-------------------|---------------------|--------------------|
| 1.married      | 0.0799<br>-0.164    | 0.142<br>-0.0906    | -0.765*<br>-0.43  | 0.17<br>-0.112      | -0.0458<br>-0.16   |
| 1.woman        | -0.109<br>-0.169    | 0.333***<br>-0.0911 | 0.798*<br>-0.478  | 0.178<br>-0.111     | 0.147<br>-0.153    |
| 1.university   | 0.0918<br>-0.232    | -0.0964<br>-0.11    | 0.359<br>-0.496   | 0.127<br>-0.138     | -0.407**<br>-0.167 |
| 1.fulltimework | 0.155<br>-0.175     | -0.0202<br>-0.0942  | 0.108<br>-0.457   | -0.128<br>-0.113    | 0.169<br>-0.153    |
| 1.over50       | -0.00674<br>-0.187  | 0.061<br>-0.0908    | -0.0487<br>-0.477 | 0.0274<br>-0.115    | 0.126<br>-0.161    |
| 1.c_rid        | -2.249***<br>-0.346 | -1.736***<br>-0.144 |                   | -1.792***<br>-0.243 | -2.599***<br>-0.52 |

|                                |           |           |           |           |           |
|--------------------------------|-----------|-----------|-----------|-----------|-----------|
| 1.c_lid                        | 2.183***  | 2.143***  | 0.368     | 1.943***  | 2.712***  |
|                                | -0.18     | -0.11     | -0.564    | -0.115    | -0.182    |
| c_rcompetence                  | -0.413    | -0.451**  | -1.901**  | -0.627*** | -0.281    |
|                                | -0.413    | -0.181    | -0.967    | -0.211    | -0.298    |
| c_rcharacter                   | -2.675*** | -1.265*** | 0.139     | -1.097*** | -1.651*** |
|                                | -0.453    | -0.198    | -0.9      | -0.211    | -0.283    |
| c_lcompetence                  | 0.59      | 1.563***  | 0.0364    | 1.563***  | 1.604***  |
|                                | -0.492    | -0.235    | -0.823    | -0.311    | -0.332    |
| c_lcharacter                   | 3.470***  | 2.362***  | 0.876     | 2.502***  | 1.219***  |
|                                | -0.529    | -0.266    | -1.089    | -0.227    | -0.325    |
| Constant                       | -2.072*** | -2.814*** | -3.211*** | -2.914*** | -1.853*** |
|                                | -0.426    | -0.236    | -1.242    | -0.305    | -0.292    |
| Observations                   | 1,539     | 4,149     | 1,382     | 2,862     | 2,015     |
| Standard errors in parentheses |           |           |           |           |           |
| *** p<0.01, ** p<0.05, * p<0.1 |           |           |           |           |           |

Regression Tables from Figure 5 (NZ)  
Impact of Traits on National Party Vote Choice

| VARIABLES      | 1990      | 1999      | 2002      | 2005      | 2014      |
|----------------|-----------|-----------|-----------|-----------|-----------|
| 1.married      | 0.437***  | 0.228**   | -0.0435   | 0.343**   | 0.0149    |
|                | -0.167    | -0.113    | -0.138    | -0.15     | -0.165    |
| 1.woman        | 0.174     | 0.508***  | -0.138    | 0.205     | 0.0894    |
|                | -0.17     | -0.111    | -0.134    | -0.141    | -0.147    |
| 1.university   | 0.158     | -0.0423   | -0.00772  | -0.340**  | 0.143     |
|                | -0.235    | -0.126    | -0.157    | -0.167    | -0.168    |
| 1.fulltimework | 0.206     | 0.325***  | 0.283**   | 0.313**   | 0.360**   |
|                | -0.175    | -0.113    | -0.14     | -0.144    | -0.153    |
| 1.over50       | -0.0851   | -0.101    | -0.598*** | -0.286**  | -0.375**  |
|                | -0.184    | -0.11     | -0.141    | -0.145    | -0.163    |
| 1.c_rid        | 2.418***  | 2.289***  | -0.729*** | 2.365***  | 1.936***  |
|                | -0.213    | -0.105    | -0.263    | -0.16     | -0.187    |
| 1.c_lid        | -2.062*** | -2.148*** | -1.535*** | -1.795*** | -1.765*** |
|                | -0.272    | -0.303    | -0.216    | -0.253    | -0.302    |
| c_rcompetence  | 1.072**   | 1.301***  | 1.490***  | 1.800***  | 2.857***  |
|                | -0.436    | -0.25     | -0.358    | -0.291    | -0.441    |
| c_rcharacter   | 3.920***  | 3.330***  | 2.841***  | 3.636***  | 3.971***  |
|                | -0.489    | -0.26     | -0.274    | -0.288    | -0.335    |
| c_lcompetence  | -0.900**  | -0.991*** | -1.071*** | -0.767**  | -1.111*** |
|                | -0.452    | -0.255    | -0.243    | -0.312    | -0.368    |
| c_lcharacter   | -1.752*** | -2.160*** | 0.961***  | -2.402*** | -1.129*** |
|                | -0.464    | -0.289    | -0.335    | -0.275    | -0.338    |

|          |           |           |           |           |           |
|----------|-----------|-----------|-----------|-----------|-----------|
| Constant | -2.238*** | -2.656*** | -2.094*** | -2.728*** | -4.483*** |
|          | -0.423    | -0.268    | -0.421    | -0.357    | -0.406    |

Observations 1,539 4,149 1,382 2,862 2,015

Standard errors in parentheses

\*\*\* p<0.01, \*\* p<0.05, \* p<0.1

#### Regression Tables from Figure 5 (NZ)

##### Impact of Thermometer Ratings on Labor Party Vote Choice

| VARIABLES        | 1990      | 1993      | 1996      | 1999      | 2002      |
|------------------|-----------|-----------|-----------|-----------|-----------|
| 1.married        | 0.122     | -0.161    | -0.0339   | 0.097     | -0.847**  |
|                  | -0.161    | -0.163    | -0.15     | -0.084    | -0.423    |
| 1.woman          | -0.151    | 0.0986    | 0.00864   | 0.226***  | 0.735     |
|                  | -0.165    | -0.158    | -0.154    | -0.0841   | -0.474    |
| 1.university     | 0.0721    | 0.279     | 0.0117    | -0.214**  | 0.213     |
|                  | -0.232    | -0.23     | -0.194    | -0.103    | -0.491    |
| 1.fulltimework   | 0.143     | 0.108     | 0.0429    | 0.00311   | -0.186    |
|                  | -0.172    | -0.17     | -0.16     | -0.0874   | -0.456    |
| 1.over50         | 0.195     | 0.332**   | 0.163     | 0.171**   | 0.155     |
|                  | -0.184    | -0.169    | -0.155    | -0.085    | -0.474    |
| 1.c_rid          | -2.432*** | -2.201*** | -1.309*** | -1.747*** |           |
|                  | -0.365    | -0.31     | -0.26     | -0.141    |           |
| 1.c_lid          | 2.184***  | 2.255***  | 2.252***  | 1.951***  | 0.21      |
|                  | -0.175    | -0.173    | -0.158    | -0.104    | -0.553    |
| c_rleadertherm   | -2.616*** | -1.619*** | -1.768*** | 1.295***  | -1.963**  |
|                  | -0.347    | -0.324    | -0.293    | -0.147    | -0.763    |
| c_lleadertherm   | 3.335***  | 3.967***  | 3.446***  | -3.312*** | -0.294    |
|                  | -0.387    | -0.385    | -0.351    | -0.209    | -0.743    |
| rightleadertherm | -0.773*** | -0.821*** | -1.292*** | 0.565***  | 0.396     |
|                  | -0.291    | -0.287    | -0.259    | -0.143    | -0.869    |
| leftleadertherm  | -1.084*** | -1.624*** | -0.547*   | 0.298*    | -0.474    |
|                  | -0.323    | -0.331    | -0.295    | -0.171    | -0.866    |
| Constant         | -0.962**  | -1.418*** | -2.099*** | -0.805*** | -2.990*** |
|                  | -0.395    | -0.387    | -0.354    | -0.201    | -0.845    |

Observations 1,661 1,726 1,891 4,937 1,515

Standard errors in parentheses

\*\*\* p<0.01, \*\* p<0.05, \* p<0.1

#### Regression Tables from Figure 5 (NZ)

##### Impact of Thermometer Ratings on National Party Vote Choice

| VARIABLES | 1990 | 1993 | 1996 | 1999 | 2002 |
|-----------|------|------|------|------|------|
|-----------|------|------|------|------|------|

|                                |           |           |           |           |           |
|--------------------------------|-----------|-----------|-----------|-----------|-----------|
| 1.married                      | 0.434***  | 0.2       | 0.103     | 0.128     | 0.165     |
|                                | -0.164    | -0.173    | -0.145    | -0.104    | -0.136    |
| 1.woman                        | 0.155     | -0.0149   | 0.205     | 0.452***  | -0.165    |
|                                | -0.167    | -0.162    | -0.15     | -0.102    | -0.132    |
| 1.university                   | 0.12      | -0.333    | -0.197    | -0.292**  | -0.238    |
|                                | -0.237    | -0.233    | -0.179    | -0.117    | -0.158    |
| 1.fulltimework                 | 0.0849    | 0.536***  | 0.163     | 0.344***  | 0.277**   |
|                                | -0.173    | -0.174    | -0.153    | -0.105    | -0.138    |
| 1.over50                       | -0.207    | -0.534*** | -0.453*** | -0.209**  | -0.443*** |
|                                | -0.18     | -0.175    | -0.151    | -0.103    | -0.141    |
| 1.c_rid                        | 2.503***  | 2.625***  | 1.721***  | 1.853***  | -0.838*** |
|                                | -0.216    | -0.175    | -0.152    | -0.0993   | -0.261    |
| 1.c_lid                        | -2.093*** | -1.686*** | -1.052*** | -1.976*** | -1.501*** |
|                                | -0.265    | -0.289    | -0.257    | -0.266    | -0.219    |
| c_rleadertherm                 | 4.577***  | 3.556***  | 3.077***  | -3.736*** | 3.926***  |
|                                | -0.395    | -0.333    | -0.306    | -0.204    | -0.292    |
| c_lleadertherm                 | -1.561*** | -0.569*   | -0.950*** | 1.453***  | -0.898*** |
|                                | -0.331    | -0.327    | -0.302    | -0.214    | -0.219    |
| rightleadertherm               | 1.266***  | -1.522*** | -1.035*** | 0.764***  | 0.236     |
|                                | -0.31     | -0.288    | -0.261    | -0.182    | -0.261    |
| leftleadertherm                | -0.877*** | -1.292*** | -0.496*   | 1.120***  | -1.207*** |
|                                | -0.336    | -0.341    | -0.283    | -0.199    | -0.255    |
| Constant                       | -2.636*** | -1.048*** | -1.808*** | -2.028*** | -1.556*** |
|                                | -0.405    | -0.385    | -0.329    | -0.241    | -0.283    |
| Observations                   | 1,661     | 1,726     | 1,891     | 4,937     | 1,515     |
| Standard errors in parentheses |           |           |           |           |           |
| *** p<0.01, ** p<0.05, * p<0.1 |           |           |           |           |           |



| 2000      | 2004      | 2006      | 2015      |
|-----------|-----------|-----------|-----------|
| 0.00385   | 0.469***  | 0.465***  | 0.0478    |
| -0.173    | -0.159    | -0.135    | -0.176    |
| 0.236     | -0.0489   | -0.324*** | -0.111    |
| -0.169    | -0.15     | -0.124    | -0.174    |
| 0.12      | 0.00565   | -0.234*   | 0.101     |
| -0.17     | -0.151    | -0.128    | -0.174    |
| 0.239     | -0.055    | 0.0405    | 0.094     |
| -0.186    | -0.175    | -0.143    | -0.19     |
| 0.379**   | 0.105     | 0.255*    | 0.0025    |
| -0.178    | -0.168    | -0.137    | -0.189    |
| 2.234***  | 1.867***  | 2.827***  | 2.098***  |
| -0.207    | -0.185    | -0.196    | -0.228    |
| -0.522**  | -0.940*** | 0.0972    | 0.0498    |
| -0.208    | -0.191    | -0.153    | -0.29     |
| -1.101**  | -1.525*** | -1.160*** | -0.285    |
| -0.539    | -0.394    | -0.301    | -0.34     |
| 0.285     | 5.797***  | 4.316***  | 2.835***  |
| -0.321    | -0.506    | -0.48     | -0.357    |
| 2.691***  | -0.641    | 1.989***  | 2.175***  |
| -0.375    | -0.417    | -0.45     | -0.36     |
| -0.936**  | -2.005*** | -0.804**  | -1.776*** |
| -0.373    | -0.374    | -0.389    | -0.383    |
| -0.992*** | 1.391***  | -0.942**  | -1.073*** |
| -0.373    | -0.415    | -0.376    | -0.361    |
| -0.657*   | -2.723*** | -2.245*** | -1.405*** |
| -0.349    | -0.41     | -0.468    | -0.395    |
| 0.458     | 0.636     | -1.221*** | -0.275    |
| -0.384    | -0.427    | -0.461    | -0.382    |
| -2.725*** | -2.809*** | -2.011*** | -2.445*** |
| -0.313    | -0.428    | -0.312    | -0.331    |
| 1,841     | 1,718     | 2,355     | 2,295     |

| 2000      | 2004      | 2006      | 2015      |
|-----------|-----------|-----------|-----------|
| -0.106    | -0.219    | -0.0641   | 0.323***  |
| -0.13     | -0.144    | -0.134    | -0.119    |
| -0.0813   | 0.183     | 0.118     | 0.0828    |
| -0.128    | -0.14     | -0.126    | -0.116    |
| 0.0455    | -0.073    | 0.177     | -0.0329   |
| -0.131    | -0.142    | -0.133    | -0.118    |
| 0.167     | 0.186     | 0.0641    | 0.299**   |
| -0.141    | -0.163    | -0.146    | -0.126    |
| -0.0815   | 0.279*    | -0.19     | -0.357*** |
| -0.138    | -0.155    | -0.141    | -0.125    |
| -0.815*** | -0.468**  | -1.777*** | 0.186     |
| -0.286    | -0.227    | -0.343    | -0.196    |
| 2.769***  | 1.917***  | 1.419***  | 2.151***  |
| -0.136    | -0.156    | -0.144    | -0.169    |
| -0.560*   | -1.554*** | -0.656*** | -0.176    |
| -0.309    | -0.333    | -0.248    | -0.171    |
| 0.0735    | -2.605*** | -1.443*** | -0.742*** |
| -0.246    | -0.392    | -0.4      | -0.245    |
| -0.0956   | 1.577***  | -1.654*** | -0.827*** |
| -0.317    | -0.381    | -0.399    | -0.292    |
| 2.018***  | 4.761***  | 3.202***  | 1.738***  |
| -0.256    | -0.426    | -0.48     | -0.252    |
| -0.135    | -0.357    | 3.123***  | 1.900***  |
| -0.266    | -0.378    | -0.432    | -0.258    |
| -0.158    | -0.631*   | -0.61     | -0.901*** |
| -0.251    | -0.383    | -0.478    | -0.288    |
| 0.491     | -0.402    | -1.227*** | -0.818*** |
| -0.305    | -0.399    | -0.476    | -0.279    |
| -1.894*** | -2.977*** | -2.356*** | -1.612*** |
| -0.23     | -0.406    | -0.332    | -0.227    |
| 1,841     | 1,718     | 2,355     | 2,295     |

| 1988   | 1993   | 1997   | 2000   | 2004    | 2006     | 2008   |
|--------|--------|--------|--------|---------|----------|--------|
| 0.207  | -0.122 | -0.159 | 0.0869 | 0.392** | 0.467*** | 0.0152 |
| -0.173 | -0.218 | -0.151 | -0.181 | -0.153  | -0.138   | -0.176 |

|           |           |           |           |           |           |           |
|-----------|-----------|-----------|-----------|-----------|-----------|-----------|
| -0.352**  | 0.126     | 0.151     | 0.263     | 0.0513    | -0.290**  | -0.187    |
| -0.165    | -0.206    | -0.145    | -0.175    | -0.144    | -0.126    | -0.164    |
| 0.199     | -0.403*   | 0.0849    | 0.0874    | -0.0259   | -0.152    | -0.0202   |
| -0.168    | -0.214    | -0.15     | -0.175    | -0.147    | -0.13     | -0.169    |
| -0.109    | 0.142     | 0.0609    | 0.245     | -0.0539   | 0.0955    | 0.0664    |
| -0.196    | -0.246    | -0.155    | -0.194    | -0.167    | -0.147    | -0.188    |
| 0.0257    | -0.295    | 0.206     | 0.397**   | 0.0216    | 0.233*    | 0.327*    |
| -0.195    | -0.253    | -0.163    | -0.184    | -0.161    | -0.14     | -0.179    |
| 1.277***  | 1.514***  | 1.766***  | 1.969***  | 1.969***  | 2.577***  | 1.936***  |
| -0.203    | -0.241    | -0.175    | -0.213    | -0.18     | -0.193    | -0.2      |
| -0.506**  | -0.363    | -0.181    | -0.436*   | -0.975*** | 0.219     | -0.356*   |
| -0.214    | -0.351    | -0.2      | -0.232    | -0.185    | -0.161    | -0.205    |
| -1.044*** | -0.644    | -2.293*** | -1.628*** | -1.225*** | -0.982*** | -0.538    |
| -0.319    | -0.572    | -0.726    | -0.613    | -0.373    | -0.309    | -0.339    |
| 4.860***  | 5.129***  | 3.477***  | 2.055***  | 5.473***  | 5.747***  | 6.356***  |
| -0.459    | -0.695    | -0.4      | -0.446    | -0.407    | -0.351    | -0.449    |
| -2.826*** | -2.421*** | -1.248*** | -0.402    | -2.009*** | -1.963*** | -2.473*** |
| -0.431    | -0.574    | -0.324    | -0.345    | -0.313    | -0.283    | -0.376    |
| -1.928*** | -0.61     |           | 0.539     | -2.600*** | -2.922*** | -3.101*** |
| -0.422    | -0.594    |           | -0.44     | -0.364    | -0.337    | -0.419    |
| -0.677*   | -3.761*** | -3.289*** | -3.843*** | -1.902*** | -1.734*** | -2.044*** |
| -0.406    | -0.546    | -0.306    | -0.369    | -0.308    | -0.267    | -0.381    |
| 1,210     | 1,136     | 1,595     | 1,616     | 1,896     | 2,445     | 1,685     |

| 1988      | 1993     | 1997    | 2000    | 2004      | 2006      | 2008      |
|-----------|----------|---------|---------|-----------|-----------|-----------|
| -0.185    | -0.0371  | 0.251*  | -0.271* | -0.169    | -0.168    | 0.111     |
| -0.168    | -0.159   | -0.141  | -0.148  | -0.139    | -0.133    | -0.158    |
| 0.176     | 0.293*   | -0.0371 | -0.191  | 0.106     | 0.0801    | -0.0649   |
| -0.163    | -0.152   | -0.134  | -0.146  | -0.135    | -0.125    | -0.146    |
| 0.0908    | -0.334** | 0.0123  | 0.0279  | 0.0139    | 0.0791    | 0.037     |
| -0.17     | -0.156   | -0.139  | -0.147  | -0.138    | -0.131    | -0.154    |
| 0.04      | -0.109   | 0.113   | 0.178   | 0.185     | 0.00344   | -0.0557   |
| -0.19     | -0.174   | -0.144  | -0.16   | -0.157    | -0.145    | -0.164    |
| -0.0374   | 0.0323   | -0.0972 | 0.102   | 0.359**   | -0.074    | 0.121     |
| -0.192    | -0.175   | -0.152  | -0.154  | -0.15     | -0.138    | -0.157    |
| -1.167*** | 0.0449   | -0.243  | -0.602* | -0.623*** | -1.318*** | -1.181*** |
| -0.259    | -0.201   | -0.208  | -0.312  | -0.22     | -0.302    | -0.28     |

|           |           |           |           |           |           |           |
|-----------|-----------|-----------|-----------|-----------|-----------|-----------|
| 1.173***  | 1.894***  | 1.819***  | 2.388***  | 1.765***  | 1.334***  | 1.900***  |
| -0.191    | -0.19     | -0.156    | -0.155    | -0.151    | -0.147    | -0.16     |
| -1.408*** | -0.559**  | -0.829*** | -0.513    | -1.509*** | -0.540**  | -0.810*** |
| -0.291    | -0.284    | -0.301    | -0.332    | -0.323    | -0.243    | -0.283    |
| -2.633*** | -1.076*** | -1.355*** | -1.296*** | -2.640*** | -2.685*** | -1.392*** |
| -0.383    | -0.398    | -0.351    | -0.362    | -0.32     | -0.279    | -0.271    |
| 3.589***  | 5.301***  | 4.438***  | 3.832***  | 4.798***  | 5.318***  | 3.542***  |
| -0.444    | -0.535    | -0.374    | -0.322    | -0.356    | -0.356    | -0.354    |
| 0.115     | -0.462    |           | -0.951**  | -0.900*** | -1.753*** | -0.885**  |
| -0.422    | -0.451    |           | -0.371    | -0.323    | -0.318    | -0.353    |
| -1.416*** | -2.938*** | -3.262*** | -2.231*** | -2.304*** | -2.227*** | -2.222*** |
| -0.404    | -0.377    | -0.288    | -0.267    | -0.294    | -0.283    | -0.348    |
| 1,210     | 1,136     | 1,595     | 1,616     | 1,896     | 2,445     | 1,685     |

|           |          |
|-----------|----------|
| 2005      | 2010     |
| 0.477**   | -0.222   |
| -0.24     | -0.249   |
| 0.0198    | -0.304   |
| -0.229    | -0.238   |
| -0.00631  | 0.591**  |
| -0.231    | -0.248   |
| 0.366     | -0.00316 |
| -0.253    | -0.276   |
| 0.256     | 0.417    |
| -0.254    | -0.269   |
| 2.616***  | 2.553*** |
| -0.279    | -0.325   |
| -0.945*** | -0.37    |
| -0.362    | -0.371   |
| -0.286    | -0.813** |
| -0.387    | -0.387   |
| 0.64      | 1.005    |
| -0.944    | -0.953   |
| 5.231***  | 3.254*** |
| -1.066    | -0.899   |
| -0.899    | -1.629*  |

|           |           |
|-----------|-----------|
| -0.677    | -0.849    |
| -1.542**  | -2.554*** |
| -0.757    | -0.866    |
| -0.727    | -1.511    |
| -0.896    | -1.008    |
| -2.808*** | -0.0381   |
| -0.999    | -0.946    |
| -2.313*** | -1.291**  |
| -0.531    | -0.522    |
| 994       | 856       |

|           |          |
|-----------|----------|
| 2005      | 2010     |
| -0.0805   | -0.132   |
| -0.211    | -0.256   |
| 0.24      | 0.124    |
| -0.206    | -0.243   |
| -0.155    | -0.268   |
| -0.208    | -0.262   |
| -0.430*   | -0.550*  |
| -0.232    | -0.294   |
| -0.849*** | -0.628** |
| -0.223    | -0.281   |
| -0.880**  | -0.981*  |
| -0.345    | -0.513   |
| 2.016***  | 2.388*** |
| -0.257    | -0.381   |
| -0.202    | -0.172   |
| -0.328    | -0.499   |
| -0.901    | -0.784   |
| -0.803    | -0.877   |
| -2.164**  | -0.294   |
| -0.922    | -0.81    |
| 0.809     | 2.889*** |
| -0.683    | -0.909   |
| 5.086***  | 1.963**  |
| -0.761    | -0.906   |

|           |           |
|-----------|-----------|
| 0.971     | -1.006    |
| -0.826    | -1.067    |
| -3.089*** | -1.985**  |
| -0.898    | -0.943    |
| -1.030**  | -1.637*** |
| -0.493    | -0.561    |
| 994       | 856       |

|           |           |
|-----------|-----------|
| 2010      | 2015      |
| -0.311    | 0.277*    |
| -0.245    | -0.167    |
| -0.358    | 0.438***  |
| -0.233    | -0.166    |
| 0.332     | -0.209    |
| -0.236    | -0.168    |
| 0.043     | 0.444**   |
| -0.268    | -0.182    |
| 0.471*    | -0.114    |
| -0.262    | -0.182    |
| 2.579***  | 3.005***  |
| -0.309    | -0.204    |
| -0.465    | -0.704*** |
| -0.349    | -0.238    |
| -0.616*   | -0.0311   |
| -0.374    | -0.295    |
| 4.168***  | 4.175***  |
| -0.62     | -0.397    |
| -2.903*** | -0.945**  |
| -0.501    | -0.385    |
| -1.480**  | -0.221    |
| -0.659    | -0.396    |
| -1.751*** | -3.765*** |
| -0.514    | -0.369    |
| 904       | 1,917     |

| 2010      | 2015      |
|-----------|-----------|
| -0.128    | -0.148    |
| -0.242    | -0.164    |
| 0.125     | 0.111     |
| -0.233    | -0.164    |
| -0.19     | -0.283*   |
| -0.245    | -0.169    |
| -0.546**  | 0.216     |
| -0.278    | -0.177    |
| -0.762*** | -0.446**  |
| -0.268    | -0.176    |
| -1.070**  | -1.669*** |
| -0.469    | -0.389    |
| 2.347***  | 3.148***  |
| -0.333    | -0.194    |
| -0.558    | 0.690**   |
| -0.455    | -0.285    |
| -1.270**  | -1.811*** |
| -0.528    | -0.34     |
| 3.767***  | 2.644***  |
| -0.535    | -0.363    |
| -1.434**  | -0.356    |
| -0.666    | -0.388    |
| -1.558*** | -1.748*** |
| -0.52     | -0.306    |
| 904       | 1,917     |

| 1992   | 1996    | 2000   | 2004   | 2008    | 2012   | 2016   |
|--------|---------|--------|--------|---------|--------|--------|
| 0.17   | -0.0515 | 0.239  | 0.0841 | 0.503** | 0.276* | 0.0153 |
| -0.171 | -0.238  | -0.228 | -0.299 | -0.221  | -0.156 | -0.173 |

|           |           |           |           |           |           |           |
|-----------|-----------|-----------|-----------|-----------|-----------|-----------|
| 0.285*    | -0.00323  | -0.174    | 0.0826    | 0.420*    | 0.476***  | 0.184     |
| -0.169    | -0.23     | -0.227    | -0.305    | -0.229    | -0.158    | -0.172    |
| 0.483***  | 0.630***  | -0.192    | 0.274     | -0.19     | -0.313*   | -0.156    |
| -0.177    | -0.237    | -0.238    | -0.317    | -0.257    | -0.166    | -0.178    |
| 0.00809   | -0.222    | 0.239     | -0.196    | 0.847***  | 0.368**   | 0.151     |
| -0.198    | -0.27     | -0.265    | -0.366    | -0.25     | -0.166    | -0.188    |
| 0.231     | 0.670***  | 0.388     | -0.117    | 0.351     | 0.26      | 0.719***  |
| -0.181    | -0.259    | -0.252    | -0.327    | -0.242    | -0.163    | -0.182    |
| 0.743***  | 1.596***  | 1.859***  | 1.379***  | 1.570***  | 1.386***  | 0.981***  |
| -0.18     | -0.252    | -0.294    | -0.382    | -0.315    | -0.207    | -0.243    |
| -1.188*** | -0.964*** | -1.974*** | -1.119*** | -1.629*** | -0.719*** | -0.920*** |
| -0.23     | -0.309    | -0.287    | -0.37     | -0.319    | -0.208    | -0.265    |
| 3.882***  | 3.626***  | 4.584***  | 3.979***  | 2.920***  | 2.803***  | 2.438***  |
| -0.633    | -0.845    | -0.723    | -1.003    | -0.752    | -0.5      | -0.46     |
| 4.081***  | 3.387***  | 4.958***  | 5.454***  | 3.850***  | 5.019***  | 5.849***  |
| -0.556    | -0.775    | -0.732    | -0.924    | -0.702    | -0.489    | -0.728    |
| -2.734*** | -3.190*** | -3.231*** | -2.941*** | -2.857*** | -3.042*** | -1.848*** |
| -0.623    | -0.864    | -0.661    | -1.139    | -0.705    | -0.501    | -0.444    |
| -3.135*** | -5.345*** | -3.764*** | -4.859*** | -4.640*** | -4.006*** | -4.201*** |
| -0.532    | -0.746    | -0.632    | -0.987    | -0.67     | -0.438    | -0.581    |
| -2.714*** | -1.111*   | -1.786**  | -0.986    | -1.003*   | -1.257*** | -1.694*** |
| -0.483    | -0.621    | -0.695    | -0.945    | -0.554    | -0.325    | -0.406    |
| 1,568     | 1,110     | 1,123     | 798       | 1,511     | 3,812     | 2,553     |

| 1992      | 1996      | 2000      | 2004      | 2008      | 2012      | 2016      |
|-----------|-----------|-----------|-----------|-----------|-----------|-----------|
| -0.474*** | -0.325    | -0.117    | 0.4       | -0.325    | -0.064    | 0.00181   |
| -0.158    | -0.216    | -0.215    | -0.308    | -0.217    | -0.152    | -0.174    |
| 0.285*    | 0.0895    | 0.313     | 0.187     | -0.228    | -0.146    | -0.156    |
| -0.158    | -0.213    | -0.214    | -0.309    | -0.223    | -0.151    | -0.172    |
| 0.256     | 0.048     | -0.0441   | -0.288    | -0.133    | 0.00415   | 0.178     |
| -0.175    | -0.221    | -0.225    | -0.319    | -0.252    | -0.159    | -0.178    |
| -0.015    | 0.159     | -0.247    | 0.45      | -0.735*** | -0.294*   | -3.59E-05 |
| -0.181    | -0.252    | -0.248    | -0.367    | -0.244    | -0.161    | -0.189    |
| 0.353**   | -0.0974   | -0.218    | 0.474     | -0.519**  | -0.0116   | -0.00111  |
| -0.172    | -0.24     | -0.236    | -0.332    | -0.237    | -0.157    | -0.181    |
| -0.941*** | -1.139*** | -1.470*** | -1.041*** | -1.394*** | -0.998*** | -0.891*** |
| -0.224    | -0.264    | -0.287    | -0.394    | -0.315    | -0.212    | -0.264    |



|           |           |           |           |           |           |           |
|-----------|-----------|-----------|-----------|-----------|-----------|-----------|
| 1.381***  | 1.188***  | 2.417***  | 1.433***  | 1.739***  | 1.283***  | 1.254***  |
| -0.171    | -0.244    | -0.268    | -0.373    | -0.308    | -0.192    | -0.243    |
| -2.523*** | -1.837**  | -2.955*** | -3.851*** | -3.105*** | -2.407*** | -2.504*** |
| -0.587    | -0.762    | -0.615    | -0.997    | -0.724    | -0.478    | -0.464    |
| -3.247*** | -2.547*** | -3.347*** | -5.602*** | -2.511*** | -3.501*** | -4.054*** |
| -0.499    | -0.696    | -0.673    | -0.939    | -0.66     | -0.461    | -0.725    |
| 3.304***  | 4.560***  | 2.857***  | 4.146***  | 3.301***  | 2.204***  | 2.139***  |
| -0.656    | -0.879    | -0.618    | -1.198    | -0.705    | -0.501    | -0.456    |
| 4.130***  | 5.202***  | 4.307***  | 5.009***  | 4.957***  | 5.270***  | 5.532***  |
| -0.567    | -0.721    | -0.628    | -1.005    | -0.665    | -0.45     | -0.569    |
| -1.615*** | -2.712*** | -1.022    | -0.917    | -0.627    | -1.033*** | -1.592*** |
| -0.451    | -0.603    | -0.646    | -0.95     | -0.541    | -0.314    | -0.411    |
| 1,568     | 1,110     | 1,123     | 798       | 1,511     | 3,812     | 2,553     |

|           |           |           |           |           |           |           |
|-----------|-----------|-----------|-----------|-----------|-----------|-----------|
| 1992      | 1996      | 2000      | 2004      | 2008      | 2012      | 2016      |
| 0.218     | -0.302    | 0.286     | 0.0833    | 0.453*    | 0.192     | -0.0338   |
| -0.178    | -0.263    | -0.227    | -0.307    | -0.238    | -0.166    | -0.18     |
| 0.334*    | -0.0525   | 0.104     | 0.286     | 0.34      | 0.486***  | 0.348*    |
| -0.179    | -0.249    | -0.229    | -0.311    | -0.245    | -0.169    | -0.179    |
| 0.405**   | 0.829***  | -0.268    | 0.147     | -0.203    | -0.271    | -0.165    |
| -0.193    | -0.257    | -0.235    | -0.337    | -0.28     | -0.176    | -0.183    |
| -0.127    | -0.291    | 0.215     | 0.189     | 0.545**   | 0.269     | 0.192     |
| -0.206    | -0.295    | -0.266    | -0.363    | -0.262    | -0.177    | -0.196    |
| 0.378**   | 0.336     | 0.235     | 0.216     | 0.175     | 0.305*    | 0.635***  |
| -0.189    | -0.279    | -0.253    | -0.323    | -0.255    | -0.174    | -0.188    |
| 0.399**   | 1.256***  | 1.522***  | 1.276***  | 1.197***  | 1.153***  | 0.933***  |
| -0.192    | -0.278    | -0.291    | -0.392    | -0.335    | -0.22     | -0.243    |
| -0.881*** | -0.733**  | -1.811*** | -0.828**  | -1.406*** | -0.599*** | -0.969*** |
| -0.237    | -0.336    | -0.301    | -0.382    | -0.338    | -0.223    | -0.269    |
| 7.785***  | 7.944***  | 7.011***  | 7.238***  | 7.648***  | 7.806***  | 6.718***  |
| -0.543    | -0.825    | -0.637    | -0.755    | -0.734    | -0.466    | -0.37     |
| -4.735*** | -7.199*** | -6.042*** | -5.490*** | -7.456*** | -6.502*** | -3.404*** |
| -0.439    | -0.659    | -0.619    | -0.902    | -0.663    | -0.379    | -0.316    |
| -3.333*** | -1.257**  | -1.067**  | -1.766**  | -1.288**  | -1.636*** | -2.346*** |
| -0.468    | -0.608    | -0.533    | -0.778    | -0.604    | -0.367    | -0.374    |
| 1,591     | 1,119     | 1,138     | 806       | 1,511     | 3,826     | 2,542     |

| 1992      | 1996      | 2000      | 2004      | 2008      | 2012      | 2016      |
|-----------|-----------|-----------|-----------|-----------|-----------|-----------|
| -0.570*** | -0.242    | -0.113    | 0.439     | -0.246    | 0.0241    | 0.131     |
| -0.163    | -0.217    | -0.22     | -0.318    | -0.231    | -0.163    | -0.177    |
| 0.313*    | 0.143     | 0.0451    | 0.0177    | -0.136    | -0.147    | -0.228    |
| -0.165    | -0.211    | -0.221    | -0.32     | -0.237    | -0.163    | -0.175    |
| 0.177     | -0.098    | 0.0168    | -0.212    | -0.15     | -0.037    | 0.223     |
| -0.189    | -0.223    | -0.226    | -0.346    | -0.272    | -0.169    | -0.181    |
| 0.0452    | 0.226     | -0.312    | -0.000116 | -0.435*   | -0.187    | -0.0491   |
| -0.186    | -0.253    | -0.258    | -0.372    | -0.253    | -0.173    | -0.191    |
| 0.334*    | 0.204     | -0.148    | 0.11      | -0.35     | 0.0535    | 0.221     |
| -0.177    | -0.241    | -0.246    | -0.33     | -0.249    | -0.169    | -0.185    |
| -0.739*** | -0.782*** | -1.118*** | -0.843**  | -0.865*** | -0.652*** | -0.752*** |
| -0.238    | -0.274    | -0.298    | -0.406    | -0.328    | -0.223    | -0.261    |
| 1.054***  | 1.027***  | 2.290***  | 1.188***  | 1.642***  | 1.172***  | 1.095***  |
| -0.176    | -0.241    | -0.285    | -0.393    | -0.322    | -0.205    | -0.243    |
| -3.940*** | -3.164*** | -5.399*** | -7.317*** | -6.429*** | -5.074*** | -5.309*** |
| -0.377    | -0.564    | -0.574    | -0.775    | -0.677    | -0.408    | -0.357    |
| 7.659***  | 8.492***  | 6.782***  | 7.058***  | 8.195***  | 8.229***  | 4.877***  |
| -0.529    | -0.72     | -0.644    | -0.97     | -0.668    | -0.427    | -0.352    |
| -2.837*** | -3.837*** | -1.005*   | -0.192    | -0.525    | -2.240*** | -0.924*** |
| -0.411    | -0.621    | -0.521    | -0.751    | -0.568    | -0.376    | -0.346    |
| 1,591     | 1,119     | 1,138     | 806       | 1,511     | 3,826     | 2,542     |

| 2004    | 2007   | 2010     | 2013    | 2016     |
|---------|--------|----------|---------|----------|
| -0.0334 | -0.185 | 0.0339   | 0.223*  | 0.00452  |
| -0.198  | -0.21  | -0.186   | -0.124  | -0.148   |
| -0.19   | 0.205  | -0.354** | 0.0948  | -0.315** |
| -0.194  | -0.197 | -0.175   | -0.115  | -0.143   |
| -0.275  | 0.0443 | 0.0734   | -0.0819 | 0.166    |
| -0.217  | -0.223 | -0.195   | -0.125  | -0.148   |
| 0.366*  | 0.319  | -0.0785  | 0.222*  | -0.104   |

|           |           |           |           |           |
|-----------|-----------|-----------|-----------|-----------|
| -0.203    | -0.206    | -0.178    | -0.121    | -0.153    |
| -0.483**  | -0.0889   | 0.14      | -0.436*** | 0.151     |
| -0.199    | -0.206    | -0.186    | -0.124    | -0.16     |
| 2.319***  | 2.723***  | 2.914***  | 2.603***  | 3.034***  |
| -0.206    | -0.204    | -0.185    | -0.133    | -0.155    |
| -1.193*** | -1.671*** | -1.049*** | -0.736*** | -0.908*** |
| -0.275    | -0.335    | -0.23     | -0.144    | -0.199    |
| 1.833***  | 2.473***  | 1.705***  | 2.049***  | 1.076**   |
| -0.625    | -0.728    | -0.638    | -0.439    | -0.523    |
| 3.096***  | 2.120***  | 2.017***  | 2.564***  | 2.550***  |
| -0.459    | -0.505    | -0.529    | -0.352    | -0.447    |
| -1.819*** | -2.208*** | -1.323**  | -1.082*** | -0.937*   |
| -0.633    | -0.73     | -0.593    | -0.403    | -0.544    |
| -0.379    | -1.088*   | -1.542*** | -0.764**  | -1.764*** |
| -0.555    | -0.65     | -0.492    | -0.336    | -0.476    |
| -2.279*** | -2.037*** | -1.616*** | -2.515*** | -2.011*** |
| -0.504    | -0.526    | -0.371    | -0.272    | -0.298    |
| 1,343     | 1,512     | 1,918     | 3,530     | 2,300     |

| 2004      | 2007      | 2010      | 2013      | 2016      |
|-----------|-----------|-----------|-----------|-----------|
| 0.342*    | -0.0924   | 0.0683    | -0.071    | 0.0481    |
| -0.2      | -0.184    | -0.166    | -0.117    | -0.147    |
| -0.0157   | 0.137     | 0.319**   | -0.226**  | 0.14      |
| -0.2      | -0.183    | -0.162    | -0.112    | -0.144    |
| -0.526**  | -0.784*** | -0.302*   | 0.114     | -0.376**  |
| -0.227    | -0.204    | -0.174    | -0.118    | -0.15     |
| 0.124     | 0.328*    | 0.181     | -0.118    | 0.19      |
| -0.211    | -0.19     | -0.165    | -0.117    | -0.153    |
| 0.0262    | -0.131    | 0.0518    | 0.0416    | -0.322**  |
| -0.202    | -0.183    | -0.167    | -0.118    | -0.158    |
| -1.231*** | -1.321*** | -1.480*** | -1.591*** | -1.876*** |
| -0.287    | -0.248    | -0.247    | -0.243    | -0.286    |
| 2.525***  | 2.818***  | 2.460***  | 2.487***  | 2.744***  |
| -0.21     | -0.204    | -0.164    | -0.119    | -0.149    |
| -0.83     | -1.670*** | -1.452**  | -1.142*** | -0.657    |
| -0.552    | -0.6      | -0.566    | -0.37     | -0.514    |
| -2.744*** | -1.704*** | -0.988**  | -1.276*** | -0.813*   |

|           |           |           |           |           |
|-----------|-----------|-----------|-----------|-----------|
| -0.456    | -0.447    | -0.484    | -0.331    | -0.434    |
| 2.107***  | 3.004***  | 1.964***  | 1.039***  | 1.153**   |
| -0.678    | -0.713    | -0.602    | -0.395    | -0.584    |
| 1.784***  | 1.569**   | 2.276***  | 1.863***  | 2.170***  |
| -0.596    | -0.637    | -0.487    | -0.329    | -0.5      |
| -1.810*** | -2.003*** | -2.689*** | -1.856*** | -2.332*** |
| -0.47     | -0.458    | -0.363    | -0.246    | -0.3      |
| 1,343     | 1,512     | 1,918     | 3,530     | 2,300     |

| 2001      | 2004      | 2007      | 2010      | 2013      | 2016      |
|-----------|-----------|-----------|-----------|-----------|-----------|
| 0.0998    | -0.0801   | -0.127    | -0.0481   | 0.218*    | -0.0182   |
| -0.197    | -0.201    | -0.211    | -0.185    | -0.124    | -0.146    |
| -0.0419   | -0.134    | 0.322     | -0.329*   | 0.029     | -0.253*   |
| -0.187    | -0.194    | -0.2      | -0.173    | -0.115    | -0.142    |
| -0.012    | -0.346    | 0.0852    | 0.212     | -0.00841  | 0.124     |
| -0.184    | -0.218    | -0.222    | -0.195    | -0.125    | -0.147    |
| 0.435**   | 0.503**   | 0.374*    | -0.19     | 0.200*    | -0.0914   |
| -0.191    | -0.204    | -0.208    | -0.179    | -0.121    | -0.152    |
| 0.159     | -0.451**  | -0.162    | 0.0697    | -0.438*** | 0.176     |
| -0.186    | -0.198    | -0.206    | -0.185    | -0.125    | -0.157    |
| 2.605***  | 2.105***  | 2.588***  | 2.842***  | 2.466***  | 2.916***  |
| -0.203    | -0.207    | -0.202    | -0.188    | -0.133    | -0.153    |
| -0.797*** | -1.104*** | -1.552*** | -0.816*** | -0.512*** | -0.847*** |
| -0.252    | -0.28     | -0.352    | -0.233    | -0.147    | -0.196    |
| 3.852***  | 3.923***  | 3.470***  | 2.873***  | 3.629***  | -2.145*** |
| -0.387    | -0.391    | -0.378    | -0.329    | -0.212    | -0.283    |
| -1.903*** | -1.449*** | -1.837*** | -2.156*** | -1.292*** | 2.887***  |
| -0.377    | -0.385    | -0.399    | -0.318    | -0.205    | -0.288    |
| -2.747*** | -2.285*** | -2.496*** | -1.562*** | -2.280*** | -1.989*** |
| -0.394    | -0.417    | -0.455    | -0.313    | -0.218    | -0.274    |
| 1,528     | 1,351     | 1,503     | 1,920     | 3,542     | 2,358     |

| 2001      | 2004      | 2007      | 2010      | 2013      | 2016      |
|-----------|-----------|-----------|-----------|-----------|-----------|
| -0.0989   | 0.478**   | -0.103    | 0.135     | -0.0375   | 0.0771    |
| -0.186    | -0.206    | -0.188    | -0.167    | -0.118    | -0.145    |
| -0.269    | -0.132    | 0.137     | 0.306*    | -0.17     | 0.0525    |
| -0.183    | -0.203    | -0.187    | -0.16     | -0.113    | -0.142    |
| -0.0825   | -0.536**  | -0.858*** | -0.443**  | 0.111     | -0.277*   |
| -0.18     | -0.228    | -0.208    | -0.174    | -0.12     | -0.147    |
| -0.131    | 0.103     | 0.407**   | 0.24      | -0.144    | 0.186     |
| -0.188    | -0.214    | -0.194    | -0.167    | -0.118    | -0.151    |
| -0.427**  | 0.154     | -0.0494   | 0.0758    | 0.121     | -0.258*   |
| -0.19     | -0.205    | -0.188    | -0.168    | -0.12     | -0.154    |
| -1.142*** | -1.162*** | -1.140*** | -1.338*** | -1.311*** | -1.669*** |
| -0.284    | -0.294    | -0.256    | -0.247    | -0.238    | -0.279    |
| 2.773***  | 2.323***  | 2.576***  | 2.288***  | 2.345***  | 2.702***  |
| -0.193    | -0.214    | -0.21     | -0.166    | -0.121    | -0.148    |
| -1.603*** | -2.506*** | -2.208*** | -1.632*** | -2.170*** | 2.824***  |
| -0.324    | -0.349    | -0.309    | -0.308    | -0.214    | -0.301    |
| 2.640***  | 3.430***  | 4.170***  | 3.601***  | 2.440***  | -1.157*** |
| -0.381    | -0.435    | -0.468    | -0.329    | -0.191    | -0.287    |
| -1.757*** | -2.033*** | -2.427*** | -2.692*** | -1.920*** | -2.302*** |
| -0.364    | -0.4      | -0.415    | -0.318    | -0.201    | -0.272    |
| 1,528     | 1,351     | 1,503     | 1,920     | 3,542     | 2,358     |



| 2005      | 2008      | 2011      | 2014      |
|-----------|-----------|-----------|-----------|
| 0.168     | 0.233     | 0.0165    | 0.000709  |
| -0.12     | -0.151    | -0.13     | -0.149    |
| 0.143     | 0.0678    | 0.0442    | 0.0917    |
| -0.116    | -0.144    | -0.127    | -0.144    |
| -0.117    | -0.425**  | -0.373**  | -0.335**  |
| -0.146    | -0.167    | -0.148    | -0.16     |
| -0.0705   | -0.0773   | -0.0791   | 0.129     |
| -0.119    | -0.147    | -0.13     | -0.145    |
| -0.00508  | 0.0284    | -0.303**  | 0.0903    |
| -0.12     | -0.153    | -0.131    | -0.15     |
| -1.464*** | -1.417*** | -1.857*** | -2.345*** |
| -0.254    | -0.412    | -0.341    | -0.47     |
| 1.587***  | 1.869***  | 2.091***  | 2.504***  |
| -0.122    | -0.17     | -0.137    | -0.171    |
| -1.459*** | -1.990*** | -1.637*** | -1.973*** |
| -0.208    | -0.261    | -0.199    | -0.22     |
| 3.943***  | 4.466***  | 2.504***  | 2.950***  |
| -0.265    | -0.356    | -0.268    | -0.299    |
| -0.740*** | -0.355    | -0.121    | -0.141    |
| -0.202    | -0.25     | -0.208    | -0.262    |
| -0.0352   | -0.295    |           |           |
| -0.251    | -0.3      |           |           |
| -2.464*** | -2.835*** | -1.554*** | -1.807*** |
| -0.251    | -0.345    | -0.244    | -0.296    |
| 2,775     | 2,044     | 2,390     | 2,282     |

|      |      |      |      |
|------|------|------|------|
| 2005 | 2008 | 2011 | 2014 |
|------|------|------|------|

|           |           |           |           |
|-----------|-----------|-----------|-----------|
| 0.415**   | 0.0876    | -0.0195   | -0.294*   |
| -0.165    | -0.162    | -0.161    | -0.165    |
| 0.257*    | 0.399***  | 0.309**   | 0.157     |
| -0.156    | -0.151    | -0.149    | -0.15     |
| -0.451**  | -0.0707   | -0.1      | -0.0773   |
| -0.185    | -0.17     | -0.169    | -0.165    |
| 0.225     | 0.125     | 0.385**   | 0.313**   |
| -0.161    | -0.153    | -0.155    | -0.155    |
| -0.225    | -0.0585   | -0.221    | -0.115    |
| -0.159    | -0.155    | -0.158    | -0.164    |
| 2.012***  | 1.220***  | 1.590***  | 1.592***  |
| -0.176    | -0.218    | -0.189    | -0.189    |
| -1.335*** | -1.663*** | -1.983*** | -1.173*** |
| -0.269    | -0.306    | -0.313    | -0.289    |
| 5.740***  | 5.861***  | 7.057***  | 7.462***  |
| -0.344    | -0.387    | -0.426    | -0.429    |
| -1.680*** | -1.737*** | -1.731*** | -1.191*** |
| -0.283    | -0.283    | -0.321    | -0.33     |
| -1.408*** | -1.623*** | -2.247*** | -2.528*** |
| -0.28     | -0.273    | -0.266    | -0.295    |
| -1.087*** | -0.770**  |           |           |
| -0.342    | -0.331    |           |           |
| -2.577*** | -2.757*** | -4.116*** | -4.108*** |
| -0.348    | -0.379    | -0.402    | -0.413    |
| 2,775     | 2,044     | 2,390     | 2,282     |





| 2011   | 2015   |
|--------|--------|
| 0.172  | 0.0383 |
| -0.147 | -0.12  |

|           |           |
|-----------|-----------|
| 0.132     | -0.0265   |
| -0.138    | -0.111    |
| -0.103    | 0.174     |
| -0.144    | -0.116    |
| 0.161     | 0.171     |
| -0.156    | -0.124    |
| -0.0361   | 0.0627    |
| -0.16     | -0.126    |
| 1.793***  | 1.603***  |
| -0.172    | -0.14     |
| -0.642*** | -0.211    |
| -0.175    | -0.179    |
| -1.794*** | -0.800*** |
| -0.358    | -0.269    |
| 5.533***  | 5.491***  |
| -0.319    | -0.261    |
| -1.745*** | -2.823*** |
| -0.308    | -0.243    |
| -3.299*** | -2.290*** |
| -0.346    | -0.252    |
| -1.259*** | -2.177*** |
| -0.292    | -0.237    |
| 2,556     | 5,004     |

| 2011      | 2015     |
|-----------|----------|
| 0.0338    | 0.194**  |
| -0.135    | -0.0816  |
| -0.0512   | 0.0545   |
| -0.128    | -0.0767  |
| 0.169     | -0.0429  |
| -0.136    | -0.08    |
| -0.298**  | 0.13     |
| -0.14     | -0.0844  |
| 0.333**   | -0.213** |
| -0.148    | -0.0848  |
| -0.955*** | -0.196   |
| -0.27     | -0.125   |

|           |           |
|-----------|-----------|
| 1.872***  | 1.665***  |
| -0.148    | -0.106    |
| -0.704**  | -0.405*** |
| -0.287    | -0.114    |
| -1.356*** | -1.293*** |
| -0.238    | -0.155    |
| 3.209***  | 4.405***  |
| -0.319    | -0.197    |
| -1.774*** | -1.568*** |
| -0.329    | -0.192    |
| -2.151*** | -1.898*** |
| -0.286    | -0.173    |
| 2,556     | 5,004     |
